# Supplementary material
Source: PubMed Central journal article supplement (PMC5634533)
Supplement: NIHMS833409-supplement-supplement_1.pdf [file NIHMS833409-supplement-supplement_1.pdf]

## Supplementary Tables - Additional Simulations

Table S1: Simulation results for designs with a control arm in the null scenario with all  $p_k = 0.20$ , for  $N=500$ .  $\bar{n}$  = mean per-arm sample size. Each  $\eta_m = \Pr(N_C > N_k + m)$ , the probability that the number of patients randomized to arm  $C$  is at least  $m$  larger than the number randomized to arm  $E_k$ . Values in the row  $E_1 - E_4$  are per-arm.

| Method                  | Arm       | Pr(Select) | Pr(Stop) | $\bar{n}$ (95% CI) | $\eta_{10}, \eta_{20}, \eta_{30}$ |
|-------------------------|-----------|------------|----------|--------------------|-----------------------------------|
| AR(1, 0)                | C         | –          | –        | 37 (10, 64)        | –                                 |
|                         | $E_1-E_4$ | 0.01       | 0.84     | 62 (10, 262)       | 0.4, 0.28, 0.16                   |
|                         | Total     |            |          | 283 (70, 500)      |                                   |
| AR( $\frac{1}{2}$ , 0)  | C         | –          | –        | 46 (17, 76)        | –                                 |
|                         | $E_1-E_4$ | 0.01       | 0.92     | 53 (10, 194)       | 0.5, 0.39, 0.26                   |
|                         | Total     |            |          | 258 (70, 500)      |                                   |
| AR( $\frac{n}{2N}$ , 0) | C         | –          | –        | 49 (16, 79)        | –                                 |
|                         | $E_1-E_4$ | 0.01       | 0.92     | 51 (10, 198)       | 0.54, 0.43, 0.31                  |
|                         | Total     |            |          | 252 (70, 500)      |                                   |
| AR(1, 0.1)              | C         | –          | –        | 45 (21, 67)        | –                                 |
|                         | $E_1-E_4$ | 0.01       | 0.96     | 53 (10, 212)       | 0.51, 0.39, 0.25                  |
|                         | Total     |            |          | 258 (80, 500)      |                                   |
| ER                      | C         | –          | –        | 74 (17, 157)       | –                                 |
|                         | $E_1-E_4$ | 0          | 0.99     | 42 (10, 128)       | 0.68, 0.54, 0.43                  |
|                         | Total     |            |          | 242 (70, 500)      |                                   |

Table S2: Simulation results for designs with a control arm in the LFC scenario  $p_C = p_1 = p_2 = p_3 = 0.20, p_4 = 0.40,$ , for  $N=500$ .  $\bar{n}$  = mean per-arm sample size. Each  $\eta_m = \Pr(N_C > N_k + m)$ , the probability that the number of patients randomized to arm  $C$  is at least  $m$  larger than the number randomized to arm  $E_k$ . Values in the row  $E_1 - E_4$  are per-arm.

| Method                  | Arm       | Pr(Select) | Pr(Stop) | $\bar{n}$ (95% CI) | $\eta_{10}, \eta_{20}, \eta_{30}$ |
|-------------------------|-----------|------------|----------|--------------------|-----------------------------------|
| AR(1, 0)                | C         | –          | –        | 27 (10, 65)        | –                                 |
|                         | $E_1-E_3$ | 0.02       | 0.46     | 27 (10, 82)        | 0.34, 0.2, 0.1                    |
|                         | $E_4$     | 0.53       | 0.07     | 369 (11, 444)      | 0.03, 0.02,0.01                   |
|                         | Total     |            |          | 477 (130, 500)     |                                   |
| AR( $\frac{1}{2}$ , 0)  | C         | –          | –        | 47 (13, 95)        | –                                 |
|                         | $E_1-E_3$ | 0.03       | 0.70     | 36 (10, 101)       | 0.54, 0.42, 0.29                  |
|                         | $E_4$     | 0.67       | 0.09     | 319 (10, 413)      | 0.05, 0.04,0.03                   |
|                         | Total     |            |          | 474 (130, 500)     |                                   |
| AR( $\frac{n}{2N}$ , 0) | C         | –          | –        | 47 (18, 88)        | –                                 |
|                         | $E_1-E_3$ | 0.04       | 0.70     | 35 (10, 91)        | 0.57, 0.43, 0.28                  |
|                         | $E_4$     | 0.77       | 0.09     | 321 (10, 406)      | 0.05, 0.04,0.03                   |
|                         | Total     |            |          | 473 (130, 500)     |                                   |
| AR(1, 0.1)              | C         | –          | –        | 58 (39, 83)        | –                                 |
|                         | $E_1-E_3$ | 0.05       | 0.81     | 35 (10, 89)        | 0.7, 0.59, 0.47                   |
|                         | $E_4$     | 0.87       | 0.08     | 313 (11, 403)      | 0.05, 0.05,0.04                   |
|                         | Total     |            |          | 477 (130, 500)     |                                   |
| ER                      | C         | –          | –        | 177 (40, 238)      | –                                 |
|                         | $E_1-E_3$ | 0          | 0.98     | 41 (10, 121)       | 0.95, 0.93, 0.90                  |
|                         | $E_4$     | 0.85       | 0.09     | 175 (13, 238)      | 0.32, 0.18,0.08                   |
|                         | Total     |            |          | 475 (140, 500)     |                                   |

Table S3: Simulation results for designs with a control arm in staircase scenario,  $(p_C, p_1, p_2, p_3, p_4) = (0.20, 0.25, 0.30, 0.35, 0.40)$  for  $N=500$ .  $\bar{n}$  = mean per-arm sample size. Each  $\eta_m = \Pr(N_C > N_k + m)$ , the probability that the number of patients randomized to arm  $C$  is at least  $m$  larger than the number randomized to arm  $E_k$ .

| Method                  | Arm   | Pr(Select) | Pr(Stop) | $\bar{n}$ (95% CI) | $\eta_{10}, \eta_{20}, \eta_{30}$ |
|-------------------------|-------|------------|----------|--------------------|-----------------------------------|
| AR(1, 0)                | C     | –          | –        | 25 (10, 63)        | –                                 |
|                         | $E_1$ | 0.061      | 0.31     | 36 (10, 112)       | 0.22, 0.12, 0.06                  |
|                         | $E_2$ | 0.13       | 0.22     | 61 (10, 207)       | 0.14, 0.07, 0.04                  |
|                         | $E_3$ | 0.27       | 0.14     | 119 (10, 359)      | 0.08, 0.04, 0.02                  |
|                         | $E_4$ | 0.49       | 0.076    | 251 (10, 417)      | 0.03, 0.02, 0.01                  |
| AR( $\frac{1}{2}$ , 0)  | C     | –          | –        | 40 (12, 88)        | –                                 |
|                         | $E_1$ | 0.10       | 0.47     | 48 (10, 120)       | 0.34, 0.24, 0.15                  |
|                         | $E_2$ | 0.20       | 0.31     | 76 (10, 180)       | 0.2, 0.14, 0.09                   |
|                         | $E_3$ | 0.40       | 0.18     | 123 (10, 269)      | 0.11, 0.08, 0.05                  |
|                         | $E_4$ | 0.65       | 0.078    | 206 (11, 360)      | 0.05, 0.03, 0.02                  |
| AR( $\frac{n}{2N}$ , 0) | C     | –          | –        | 40 (16, 81)        | –                                 |
|                         | $E_1$ | 0.14       | 0.46     | 45 (10, 111)       | 0.35, 0.23, 0.13                  |
|                         | $E_2$ | 0.28       | 0.31     | 71 (10, 179)       | 0.22, 0.14, 0.08                  |
|                         | $E_3$ | 0.49       | 0.17     | 119 (10, 285)      | 0.11, 0.07, 0.04                  |
|                         | $E_4$ | 0.75       | 0.078    | 218 (12, 361)      | 0.05, 0.03, 0.02                  |
| AR(1, 0.1)              | C     | –          | –        | 58 (43, 79)        | –                                 |
|                         | $E_1$ | 0.19       | 0.58     | 46 (10, 107)       | 0.51, 0.41, 0.32                  |
|                         | $E_2$ | 0.39       | 0.36     | 67 (10, 180)       | 0.31, 0.24, 0.19                  |
|                         | $E_3$ | 0.62       | 0.19     | 113 (10, 300)      | 0.16, 0.12, 0.1                   |
|                         | $E_4$ | 0.84       | 0.089    | 208 (10, 358)      | 0.07, 0.06, 0.05                  |
| ER                      | C     | –          | –        | 128 (86, 216)      | –                                 |
|                         | $E_1$ | 0.08       | 0.67     | 59 (10, 123)       | 0.79, 0.72, 0.67                  |
|                         | $E_2$ | 0.29       | 0.49     | 82 (10, 148)       | 0.58, 0.48, 0.42                  |
|                         | $E_3$ | 0.60       | 0.24     | 104 (10, 170)      | 0.41, 0.27, 0.21                  |
|                         | $E_4$ | 0.86       | 0.084    | 120 (11, 209)      | 0.32, 0.16, 0.09                  |

Table S4: Simulation results for designs without a control arm in the null scenario  $p_1 = \dots = p_5 = 0.20$ , for  $N=500$ .  $\bar{n}$  = mean per-arm sample size. Each  $\eta_m = \Pr(N_C > N_k + m)$ , the probability that the number of patients randomized to arm  $C$  is at least  $m$  larger than the number randomized to arm  $E_k$ . All values are per-arm.

| Method                  | Arm       | Pr(Select) | Pr(Stop) | $\bar{n}$ (95% CI) | $\eta_{10}, \eta_{20}, \eta_{30}$ |
|-------------------------|-----------|------------|----------|--------------------|-----------------------------------|
| AR(1, 0)                | $E_1-E_5$ | 0.01       | 0.22     | 100 (10, 294)      | 0.46, 0.43, 0.39                  |
|                         |           |            | Total    | 499 (500, 500)     |                                   |
| AR( $\frac{1}{2}$ , 0)  | $E_1-E_5$ | 0.01       | 0.3      | 99 (10, 245)       | 0.45, 0.41, 0.37                  |
|                         |           |            | Total    | 497 (500, 500)     |                                   |
| AR( $\frac{n}{2N}$ , 0) | $E_1-E_5$ | 0.01       | 0.31     | 99 (10, 255)       | 0.45, 0.41, 0.38                  |
|                         |           |            | Total    | 495 (500, 500)     |                                   |
| AR(1, 0.1)              | $E_1-E_5$ | 0.01       | 0.28     | 100 (10, 280)      | 0.45, 0.42, 0.39                  |
|                         |           |            | Total    | 498 (500, 500)     |                                   |
| ER                      | $E_1-E_5$ | 0.01       | 0.38     | 98 (10, 221)       | 0.39, 0.31, 0.27                  |
|                         |           |            | Total    | 492 (370, 500)     |                                   |

Table S5: Simulation results for designs with no control arm in the LFC scenario  $p_1 = p_2 = p_3 = p_4 = 0.20$  and  $p_5 = 0.40$ , for  $N=500$ .  $\bar{n}$  = mean per-arm sample size. Each  $\eta_m = \Pr(N_C > N_k + m)$ , the probability that the number of patients randomized to arm  $C$  is at least  $m$  larger than the number randomized to arm  $E_k$ . Values in the row  $E_1 - E_4$  are per-arm.

| Method                  | Arm       | Pr(Select) | Pr(Stop) | $\bar{n}$ (95% CI) | $\eta_{10}, \eta_{20}, \eta_{30}$ |
|-------------------------|-----------|------------|----------|--------------------|-----------------------------------|
| AR(1, 0)                | $E_1-E_4$ | 0          | 0.81     | 28 (10, 93)        | 0.3, 0.2, 0.12                    |
|                         | $E_5$     | 0.95       | 0.017    | 289 (14, 435)      | 0.02, 0.02,0.01                   |
|                         | Total     |            |          | 400 (80, 500)      |                                   |
| AR( $\frac{1}{2}$ , 0)  | $E_1-E_4$ | 0          | 0.95     | 35 (10, 115)       | 0.33, 0.24, 0.17                  |
|                         | $E_5$     | 0.96       | 0.018    | 157 (13, 327)      | 0.01, 0.01,0.01                   |
|                         | Total     |            |          | 296 (70, 500)      |                                   |
| AR( $\frac{n}{2N}$ , 0) | $E_1-E_4$ | 0          | 0.94     | 36 (10, 105)       | 0.35, 0.26, 0.19                  |
|                         | $E_5$     | 0.96       | 0.019    | 140 (11, 338)      | 0.02, 0.01,0.01                   |
|                         | Total     |            |          | 282 (70, 500)      |                                   |
| AR(1, 0.1)              | $E_1-E_4$ | 0          | 0.92     | 32 (10, 98)        | 0.32, 0.22, 0.15                  |
|                         | $E_5$     | 0.96       | 0.02     | 212 (12, 391)      | 0.02, 0.02,0.02                   |
|                         | Total     |            |          | 340 (80, 500)      |                                   |
| ER                      | $E_1-E_4$ | 0          | 0.97     | 45 (10, 152)       | 0.37, 0.29, 0.23                  |
|                         | $E_5$     | 0.93       | 0.02     | 82 (11, 180)       | 0.07, 0.03,0.02                   |
|                         | Total     |            |          | 260 (70, 500)      |                                   |

Table S6: Simulation results for designs with no control arm in the staircase scenario,  $(p_1, p_2, p_3, p_4, p_5) = (0.20, 0.25, 0.30, 0.35, 0.40)$ , for  $N=500$ .  $\bar{n}$  = mean per-arm sample size. Each  $\eta_m = \Pr(N_C > N_k + m)$ , the probability that the number of patients randomized to arm  $C$  is at least  $m$  larger than the number randomized to arm  $E_k$ .

| Method                  | Arm   | Pr(Select) | Pr(Stop) | $\bar{n}$ (95% CI) | $\eta_{10}, \eta_{20}, \eta_{30}$ |
|-------------------------|-------|------------|----------|--------------------|-----------------------------------|
| AR(1, 0)                | $E_1$ | 0          | 0.78     | 23 (10, 69)        | –                                 |
|                         | $E_2$ | 0          | 0.61     | 35 (10, 118)       | 0.2, 0.12, 0.07                   |
|                         | $E_3$ | 0.002      | 0.41     | 62 (10, 214)       | 0.14, 0.08, 0.05                  |
|                         | $E_4$ | 0.04       | 0.22     | 122 (10, 358)      | 0.07, 0.05, 0.03                  |
|                         | $E_5$ | 0.39       | 0.067    | 246 (10, 416)      | 0.04, 0.03, 0.02                  |
| AR( $\frac{1}{2}$ , 0)  | $E_1$ | 0          | 0.95     | 26 (10, 87)        | –                                 |
|                         | $E_2$ | 0          | 0.84     | 42 (10, 132)       | 0.21, 0.14, 0.09                  |
|                         | $E_3$ | 0.002      | 0.56     | 73 (10, 195)       | 0.13, 0.09, 0.06                  |
|                         | $E_4$ | 0.036      | 0.28     | 126 (10, 283)      | 0.07, 0.05, 0.04                  |
|                         | $E_5$ | 0.38       | 0.076    | 199 (10, 338)      | 0.03, 0.03, 0.02                  |
| AR( $\frac{n}{2N}$ , 0) | $E_1$ | 0          | 0.95     | 26 (10, 80)        | –                                 |
|                         | $E_2$ | 0          | 0.81     | 41 (10, 118)       | 0.21, 0.14, 0.08                  |
|                         | $E_3$ | 0.002      | 0.55     | 69 (10, 191)       | 0.13, 0.09, 0.05                  |
|                         | $E_4$ | 0.04       | 0.27     | 123 (10, 294)      | 0.07, 0.05, 0.04                  |
|                         | $E_5$ | 0.41       | 0.075    | 205 (10, 344)      | 0.03, 0.03, 0.02                  |
| AR(1, 0.1)              | $E_1$ | 0          | 0.93     | 25 (10, 75)        | –                                 |
|                         | $E_2$ | 0          | 0.77     | 39 (10, 116)       | 0.21, 0.13, 0.09                  |
|                         | $E_3$ | 0.002      | 0.502    | 66 (10, 200)       | 0.13, 0.09, 0.06                  |
|                         | $E_4$ | 0.037      | 0.25     | 122 (10, 333)      | 0.07, 0.05, 0.03                  |
|                         | $E_5$ | 0.38       | 0.069    | 226 (10, 382)      | 0.03, 0.03, 0.02                  |
| ER                      | $E_1$ | 0          | 0.99     | 29 (10, 108)       | –                                 |
|                         | $E_2$ | 0          | 0.90     | 50 (10, 162)       | 0.22, 0.15, 0.11                  |
|                         | $E_3$ | 0.0019     | 0.66     | 88 (10, 218)       | 0.13, 0.09, 0.07                  |
|                         | $E_4$ | 0.034      | 0.32     | 133 (10, 234)      | 0.08, 0.06, 0.04                  |
|                         | $E_5$ | 0.33       | 0.08     | 146 (10, 236)      | 0.04, 0.03, 0.02                  |
